# Supplementary material
Source: PubMed Central journal article supplement (PMC6210105)
Supplement: zam022188843s1.pdf [file zam022188843s1.pdf]

**Table S1.** Up-regulated genes in *Escherichia coli* O157:H7 adapted to sublethal level of thymol (1/2T), carvacrol (1/2C) or trans-cinnamaldehyde (1/2TC), compared to non-adapted cells ( $P_{adj} \leq 0.05$ , fold change  $\geq 5.0$ ). “-” indicates no detection of differentially expressed gene at the set criteria.

| Gene ID                | fold change <sup>a</sup> |        |       | Gene Product Description                                     |
|------------------------|--------------------------|--------|-------|--------------------------------------------------------------|
|                        | 1/2T                     | 1/2C   | 1/2TC |                                                              |
| <b>Cell Envelope</b>   |                          |        |       |                                                              |
| ECs1884                | 492.1                    | 416.9  | -     | phage shock protein, PspD                                    |
| ECs1883                | 528.5                    | 434.0  | -     | PspC family transcriptional regulator                        |
| pspB                   | 615.4                    | 465.0  | -     | phage shock protein, PspB                                    |
| ECs1881                | 763.2                    | 634.3  | -     | phage shock protein, PspA                                    |
| pspG                   | 1459.2                   | 1452.2 | -     | phage shock protein, PspG                                    |
| cpxP                   | 566.9                    | 374.6  | -     | cell envelope toxicity response protein, CpxP                |
| ECs2690                | 10.8                     | 7.6    | -     | transcriptional regulator, RcsA                              |
| ECs2515                | 5.3                      | 5.9    | -     | outer membrane protein                                       |
| lpxC                   | 11.0                     | 9.1    | -     | UDP-3-O-[3-hydroxymyristoyl] N-acetylglucosamine deacetylase |
| ECs2011                | 15.6                     | 9.3    | -     | phosphatidate cytidyltransferase                             |
| ECs2348                | -                        | 6.2    | -     | membrane bound lysozyme inhibitor                            |
| <b>Heat Resistance</b> |                          |        |       |                                                              |
| ECs1050                | 8.4                      | 9.8    | -     | heat shock protein, HspQ                                     |
| ECs4310                | 8.5                      | 6.0    | -     | RNA polymerase factor sigma-32                               |

|                                    |      |      |      |                                                      |
|------------------------------------|------|------|------|------------------------------------------------------|
| ECs4626                            | 22.2 | 25.2 | -    | heat shock chaperone, IbpB                           |
| ECs4627                            | 12.0 | 13.8 | -    | heat shock protein, IbpA                             |
| ECs0165                            | 13.8 | 8.5  | -    | serine endoprotease, degrade damaged proteins        |
| ECs2539                            | 15.4 | 7.5  | -    | heat shock protein, HtpX                             |
| <b>Acid Resistance</b>             |      |      |      |                                                      |
| ECs5113                            | 14.4 | -    |      | lysine decarboxylase 1, CadA                         |
| cadB                               | 16.1 | -    |      | lysine/cadaverine antiporter, CadB                   |
| ECs2303                            | 37.4 | 42.6 |      | acid-shock protein, resistance against moderate acid |
| <b>Oxidative Stress Resistance</b> |      |      |      |                                                      |
| grxA                               | 9.3  | -    | 8.8  | glutaredoxin, GrxA                                   |
| ECs4834                            | 10.5 | -    | -    | superoxide dismutase, SodA                           |
| ECs5045                            | 10.4 | 9.0  | -    | redox-sensitive transcriptional activator, SoxR      |
| ECs5044                            | 17.1 | 17.1 | -    | DNA-binding transcriptional regulator, SoxS          |
| ECs2487                            | 17.6 | 9.7  | -    | methionine sulfoxide reductase B                     |
| ECs3448                            | 22.9 | 7.2  | 8.9  | thioredoxin 2, TrxC                                  |
| ECs3271                            | 28.9 | 8.5  | 10.1 | manganese transport protein, MntH                    |
| ECs0931                            | 6.0  | 6.2  | -    | nitroreductase A                                     |
| <b>Antibiotic Resistance</b>       |      |      |      |                                                      |
| ECs2138                            | 5.4  | 5.5  | -    | family transcriptional regulator, MarA               |
| ECs2137                            | 6.3  | 6.8  | -    | family transcriptional regulator, MarR               |
| ECs0517                            | 5.6  | 10.0 | -    | family transcriptional regulator, AcrR               |

|                  |      |      |      |                                                             |
|------------------|------|------|------|-------------------------------------------------------------|
| ECs3332          | 5.3  | -    | -    | multidrug efflux system, AcrD                               |
| ECs2882          | 21.9 | -    | -    | multidrug efflux pump system protein, MdtA                  |
| ECs2883          | 15.3 | -    | -    | multidrug efflux pump system protein, MdtB                  |
| ECs2884          | 15.4 | -    | -    | multidrug efflux pump system protein, MdtC                  |
| ECs2885          | 8.4  | -    | -    | multidrug efflux pump system protein, MdtE                  |
| ECs2305          | 21.7 | 6.4  | -    | multidrug efflux pump system protein, MdtI                  |
| ECs2306          | 8.6  | -    | -    | multidrug efflux pump system protein, MdtJ                  |
| ECs0502          | -    | 9.2  | -    | multidrug transporter membrane ATP-binding components, MdlA |
| ECs3121          | 5.2  | -    | -    | antibiotic resistance protein, YwoG                         |
| ECs0427          | 5.3  | 6.0  | -    | peptide antibiotic transporter, SbmA                        |
| ECs5243          | 11.3 | 15.0 | -    | transposase, OrfA                                           |
| orfB             | 5.1  | -    | -    | transposase, OrfB                                           |
| <b>Virulence</b> |      |      |      |                                                             |
| ECs5440          | 5.7  | -    | -    | small toxic polypeptide                                     |
| ECs3771          | 8.0  | 12.4 | 8.7  | oxidoreductase, hemolysin III                               |
| ECs5277          | 5.5  | -    | -    | protein FimF                                                |
| ECs2107          | -    | 6.1  | -    | adhesin                                                     |
| bssS             | 14.5 | 8.5  | -    | biofilm formation regulatory protein, BssS                  |
| tnaA             | 32.9 | 5.0  | -    | tryptophanase, TnaA                                         |
| ECs4430          | -    | -    | 10.5 | fimbrial chaperone protein, LpfB                            |
| ECs4431          | -    | -    | 18.5 | fimbrial major protein, LpfA                                |

**Metal Ion Homeostasis (iron, zinc, copper)**

|         |      |      |     |                                                           |
|---------|------|------|-----|-----------------------------------------------------------|
| ECs0635 | 9.8  | -    | -   | 2,3-dihydro-2,3-dihydroxybenzoate dehydrogenase           |
| entF    | 7.9  | 5.5  | -   | enterobactin synthase subunit F, EntF                     |
| ECs0630 | 8.8  | -    | -   | enterobactin exporter, EntS                               |
| ECs0634 | 11.3 | 5.8  | -   | 2,3-dihydro-2,3-dihydroxybenzoate synthetase, EntB        |
| entE    | 17.7 | 9.0  | -   | 2,3-dihydroxybenzoate-AMP ligase, EntE                    |
| ECs0632 | 23.8 | 10.3 | 7.9 | isochorismate synthase, EntC                              |
| ECs0627 | 5.6  | 5.3  | 5.3 | iron-enterobactin transporter ATP-binding protein         |
| ECs0628 | 8.8  | -    | 5.8 | iron-enterobactin transporter permease                    |
| ECs0629 | 12.6 | 10.1 | 9.4 | iron-enterobactin transporter membrane protein            |
| ECs0631 | 11.1 | 7.3  | 6.8 | iron-enterobactin transporter periplasmic binding protein |
| ECs1360 | 5.8  | -    | -   | bifunctional enterobactin receptor/adhesin, Iha           |
| ECs0624 | 17.8 | 14.3 | 6.0 | enterobactin/ferric enterobactin esterase, Fes            |
| ECs4380 | 5.0  | -    | -   | heme utilization/transport protein, ChuA                  |
| ECs4382 | 16.0 | 9.7  | 7.3 | hemin binding protein, ShuT                               |
| hemH    | 9.4  | -    | 7.4 | ferrochelataase, HemH                                     |
| ECs3917 | 5.8  | -    | -   | ferrichrome iron receptor                                 |
| ECs0154 | 7.2  | 6.9  | 8.3 | ferrichrome outer membrane transporter                    |
| ECs1480 | 7.3  | -    | -   | outer membrane receptor for Fe <sup>3+</sup> uptake, FhuE |
| ECs5327 | 10.1 | 10.3 | 5.0 | ferrioxamine B reductase, FhuF                            |
| ECs3890 | 11.2 | 8.2  | 5.2 | biopolymer transport protein, ExbB                        |

|         |      |      |     |                                                           |
|---------|------|------|-----|-----------------------------------------------------------|
| ECs3889 | 5.7  | -    | -   | biopolymer transport protein, ExbD                        |
| feoA    | 6.3  | 13.5 | 5.1 | ferrous iron transport protein A, FeoA                    |
| feoB    | 5.3  | 7.7  | -   | ferrous iron transport protein B, FeoB                    |
| ECs3916 | 5.3  | 6.2  | -   | iron-siderophore iron ABC transporter ATP-binding protein |
| ECs2055 | 5.2  | -    | -   | outer membrane receptor for iron transport                |
| ECs5531 | 8.8  | 10.3 | -   | bacterioferritin-associated ferredoxin, bfd               |
| znuA    | -    | -    | -   | high-affinity zinc transporter periplasmic protein, ZnuA  |
| znuB    | 6.0  | 9.6  | -   | high-affinity zinc transporter membrane protein, ZnuB     |
| znuC    | 17.1 | 23.9 | -   | high-affinity zinc transporter ATPase, ZnuC               |
| copA    | 9.9  | -    | -   | copper exporting ATPase, CopA                             |

### **Quorum Sensing**

|         |      |      |   |                             |
|---------|------|------|---|-----------------------------|
| ECs2122 | 5.2  | -    | - | AI-2 transport system, LsrD |
| tqsA    | 13.7 | 16.9 | - | AI-2 transport system, TqsA |

### **Amino Acid Metabolism**

|         |      |      |   |                                                       |
|---------|------|------|---|-------------------------------------------------------|
| ECs4686 | 14.6 | 13.6 | - | asparagine synthetase                                 |
| ECs1874 | 6.0  | -    | - | glutamine synthetase                                  |
| ECs4646 | 20.5 | -    | - | tryptophan transporter, TnaB                          |
| ECs3656 | 5.7  | -    | - | serine transporter, SdaC                              |
| ECs3194 | 5.0  | -    | - | lysine/arginine/ornithine transporter, ArgT           |
| ECs0694 | 5.0  | 5.9  | - | glutamate/aspartate transporter subunit, YbeJ         |
| puuD    | 9.2  | 7.0  | - | $\gamma$ -glutamyl- $\gamma$ -aminobutyrate hydrolase |

|         |      |     |   |                                       |
|---------|------|-----|---|---------------------------------------|
| putA    | 5.2  | -   | - | proline dehydrogenase                 |
| ECs2523 | 13.0 | 8.2 | - | L-serine dehydratase 1                |
| ECs3657 | 6.5  | -   | - | L-serine dehydratase                  |
| ECs0116 | -    | 5.5 | - | aromatic amino acid transporter, AroP |

### **Fatty Acid Metabolism**

|      |      |     |   |                                                               |
|------|------|-----|---|---------------------------------------------------------------|
| fadA | 5.9  | -   | - | 3-ketoacyl-CoA thiolase                                       |
| fadB | 13.2 | 5.7 | - | multifunctional fatty acid oxidation complex $\alpha$ subunit |
| fadE | 13.0 | 5.6 | - | acyl-CoA dehydrogenase                                        |
| fadI | 8.4  | 8.6 | - | 3-ketoacyl-CoA thiolase                                       |

### **Carbohydrate Metabolism**

|         |      |      |   |                                                                      |
|---------|------|------|---|----------------------------------------------------------------------|
| ECs3042 | 9.7  | -    | - | galactose-binding transport protein, MglB                            |
| ECs3041 | 12.5 | -    | - | galactose/methyl galactoside transporter ATP-binding protein, MglA   |
| ECs3040 | 14.0 | -    | - | $\beta$ -methyl galactoside transporter inner membrane protein, MglC |
| ECs3043 | -    | 5.2  | - | mglBAC operon transcriptional regulator, GalS                        |
| ECs0512 | -    | 9.3  | - | maltose O-acetyltransferase                                          |
| ECs4450 | 5.9  | -    | - | xylose transporter ATP-binding protein, XylG                         |
| ECs2369 | 12.1 | 16.6 | - | putative arabinose efflux transporter, YdhC                          |
| ECs3571 | 5.6  | 8.2  | - | cellobiose-specific PTS system, IIB                                  |
| ECs4824 | 6.4  | 6.7  | - | fructose-specific PTS system, FrvX                                   |
| ECs4825 | -    | 7.9  | - | fructose-specific PTS system, IIB-like component                     |
| ECs3266 | 5.6  | 8.4  | - | fructose-specific PTS system, II-like component                      |

|         |      |      |     |                                                           |
|---------|------|------|-----|-----------------------------------------------------------|
| ECs2867 | 9.1  | -    | -   | polysaccharide export protein, wza                        |
| ECs0309 | 6.0  | 12.3 | -   | transcriptional regulator, maltose system                 |
| ECs2328 | 6.0  | 9.6  | -   | transcriptional repressor MalI, maltose-glucose transport |
| ECs3976 | 6.6  | 5.7  | -   | transcriptional repressor ExuR, hexuronate utilization    |
| ECs1862 | 15.1 | -    | -   | transcription regulator, UidR                             |
| ECs4098 | -    | 6.6  | -   | N-acetylneuraminase lyase                                 |
| ECs5319 | 5.9  | 6.9  | -   | phosphoglycerol transferase I, MdoB                       |
| mdoC    | -    | 5.6  | -   | glucans biosynthesis protein, MdoC                        |
| ECs5216 | -    | -    | 5.6 | trehalose-6-phosphate hydrolase                           |

#### **Nucleotide Metabolism**

|         |      |      |   |                                                                |
|---------|------|------|---|----------------------------------------------------------------|
| purT    | 9.3  | -    | - | glycinamide ribonucleotide transformylase (GAR transformylase) |
| nrdF    | 12.1 | -    | - | ribonucleotide-diphosphate reductase $\beta$ subunit           |
| nrdI    | 26.3 | 19.9 | - | ribonucleotide reductase stimulatory protein                   |
| nrdH    | 17.6 | 18.0 | - | glutaredoxin-like protein, NrdH                                |
| ECs3757 | -    | 5.1  | - | putative MFS transporter, purine transporter                   |
| ECs3538 | 12.3 | 6.2  | - | ribonucleotide-diphosphate reductase $\alpha$ subunit          |

#### **Energy Metabolism**

|         |      |      |   |                                                                  |
|---------|------|------|---|------------------------------------------------------------------|
| ECs3565 | 5.2  | 6.7  | - | anaerobic nitric oxide reductase transcriptional regulator, NorR |
| ECs3566 | 14.2 | 27.1 | - | flavorubredoxin, FIRd                                            |
| nirD    | 14.6 | 9.7  | - | nitrite reductase small subunit, NirD                            |
| sdhA    | 11.8 | -    | - | succinate dehydrogenase flavoprotein subunit, SdhA               |

|         |      |      |     |                                                                      |
|---------|------|------|-----|----------------------------------------------------------------------|
| sdhB    | 10.8 | -    | -   | succinate dehydrogenase iron-sulfur subunit, SdhB                    |
| sdhC    | 8.0  | -    | -   | succinate dehydrogenase cytochrome b556 large membrane subunit, SdhC |
| sdhD    | 9.9  | -    | -   | succinate dehydrogenase cytochrome b556 small membrane subunit, sdhD |
| sucA    | 5.8  | -    | -   | 2-oxoglutarate dehydrogenase subunit E1, SucA                        |
| sucC    | 5.2  | -    | -   | succinyl-CoA synthetase $\beta$ subunit, SucC                        |
| ECs0752 | 5.4  | -    | -   | dihydrolipoamide succinyltransferase                                 |
| fumC    | 23.6 | 12.6 | -   | fumarate hydratase                                                   |
| ECs5051 | 5.6  | -    | -   | acetyl-CoA synthetase                                                |
| ECs4818 | 5.5  | -    | -   | formate dehydrogenase-O $\gamma$ subunit                             |
| ECs4933 | 8.3  | -    | -   | isocitrate lyase                                                     |
| ECs4820 | 11.7 | 7.4  | -   | formate dehydrogenase-O major subunit, FdoG                          |
| ECs4819 | 13.0 | 8.0  | -   | formate dehydrogenase-O iron-sulfur subunit, FdoH                    |
| ECs3445 | 10.2 | 12.4 | -   | autonomous glycyl radical cofactor, GrcA                             |
| ECs4216 | 8.9  | 7.6  | -   | nitrite reductase (NAD(P)H) subunit, NirB                            |
| ECs3127 | 12.9 | 8.7  | 7.5 | anaerobic glycerol-3-phosphate dehydrogenase subunit B, GlpB         |
| glpC    | 9.5  | 5.7  | 6.9 | sn-glycerol-3-phosphate dehydrogenase subunit C, GlpC                |
| glpD    | 15.5 | 5.0  | 9.1 | glycerol-3-phosphate dehydrogenase, GlpD                             |
| ECs1885 | 34.0 | 33.3 | -   | thiosulfate:cyanide sulfurtransferase                                |
| ECs3090 | 5.0  | -    | -   | cytochrome c biogenesis protein, CcmA                                |
| prpB    | 5.5  | 8.1  | -   | 2-methylisocitrate lyase                                             |
| ECs0654 | 5.6  | -    | -   | citrate lyase $\alpha$ subunit, CitF                                 |



|         |      |     |   |                                              |
|---------|------|-----|---|----------------------------------------------|
| ECs4891 | 5.8  | -   | - | soluble pyridine nucleotide transhydrogenase |
| ECs3963 | 14.5 | 6.5 | - | NADPH dehydrogenase                          |
| pdhR    | 6.5  | 5.9 | - | transcriptional regulator PdhR               |

### **Regulatory Functions**

|         |      |      |   |                                                         |
|---------|------|------|---|---------------------------------------------------------|
| ECs3173 | 5.4  | -    | - | transcriptional regulator, lrhA                         |
| ECs2737 | 5.9  | -    | - | transcriptional regulator, PerC                         |
| ECs2886 | 7.8  | -    | - | two-component regulatory system, BaeS                   |
| ECs4598 | 9.7  | 12.9 | - | DNA-binding protein, putative transcriptional regulator |
| ECs0501 | 16.8 | 28.1 | - | Lrp-like transcriptional regulator, YbaO                |
| ECs0513 | -    | 10.9 | - | hemolysin expression-modulating protein                 |

### **Others/Unclassified**

|         |      |      |   |                                             |
|---------|------|------|---|---------------------------------------------|
| cpsG    | 5.0  | -    | - | phosphomannomutase, CpsG                    |
| ECs2865 | 5.7  | -    | - | tyrosine kinase, Wze                        |
| ytfG    | 5.1  | -    | - | oxidoreductase, YtfG                        |
| ECs3932 | 8.6  | 20.0 | - | oxidoreductase                              |
| ECs4383 | 5.1  | -    | - | coproporphyrinogen III oxidase              |
| ECs1773 | 5.1  | -    | - | putative prophage maintenance protein       |
| mokW    | 5.8  | -    | - | putative prophage maintenance protein, MokW |
| zraP    | 7.5  | 9.2  | - | zinc resistance protein                     |
| ECs0917 | 15.0 | 19.0 | - | dehydrogenase, YliI                         |
| ECs4240 | -    | 6.0  | - | dehydrogenase, YrfF                         |

|                             |      |       |      |                                            |
|-----------------------------|------|-------|------|--------------------------------------------|
| ECs2056                     | 21.3 | 7.9   | -    | receptor                                   |
| ECs4357                     | -    | 6.0   | -    | HicA-like protein, HicA-HicB TA system     |
| ECs4356                     | -    | 5.1   | -    | HicB-like protein, HicA-HicB TA system     |
| ECs4007                     | 6.8  | 7.9   | -    | antitoxin PrlF of YhaV-PrIF TA system      |
| ECs0552                     | 7.7  | 8.1   | -    | protease                                   |
| ECs3264                     | -    | 5.4   | -    | exoaminopeptidase                          |
| ECs3265                     | -    | 5.9   | -    | aminopeptidase                             |
| ECs1856                     | -    | 6.1   | -    | lipoprotein OsmB                           |
| ECs3842                     | 14.1 | 16.6  | -    | uncharacterized transporter, yqgA          |
| ECs3970                     | 70.6 | 108.8 | -    | uncharacterized transporter, ygjT          |
| ECs4432                     | 25.2 | -     | 20.2 | uncharacterized resistance protein, yhjX   |
| ECs3031                     | -    | 5.0   | -    | transporter                                |
| ECs5300                     | -    | 5.2   | -    | transporter, YjiO                          |
| ECs3285                     | -    | 5.2   | -    | sulfate transport protein CysZ             |
| ECs0729                     | 40.5 | 19.4  | -    | protein RhsC                               |
| ECs4114                     | -    | 6.7   | -    | p-hydroxybenzoic acid efflux subunit, AaeA |
| ECs1145                     | -    | -     | 5.0  | cold shock protein, CspG                   |
| <b>Unknown/Hypothetical</b> |      |       |      |                                            |
| ECs4381                     | 5.1  | -     | -    | hypothetical protein                       |
| ECs2025                     | 5.2  | -     | -    | hypothetical protein                       |
| ECs0869                     | 5.3  | 6.1   | -    | hypothetical protein                       |

|         |     |      |   |                      |
|---------|-----|------|---|----------------------|
| ECs5413 | 5.3 | -    | - | hypothetical protein |
| ECs2292 | 5.5 | -    | - | hypothetical protein |
| ECs5010 | 5.6 | -    | - | hypothetical protein |
| ECs0621 | 5.6 | -    | - | hypothetical protein |
| ECs0511 | 5.6 | -    | - | hypothetical protein |
| ECs5011 | 5.8 | -    | - | hypothetical protein |
| argD_1  | 5.8 | 5.3  | - | unknown              |
| ECs2144 | 5.8 | -    | - | hypothetical protein |
| ECs2010 | 5.9 | 6.6  | - | hypothetical protein |
| ECs2434 | 5.9 | 6.3  | - | hypothetical protein |
| ECs0636 | 6.0 | -    | - | hypothetical protein |
| ECs0551 | 6.0 | 6.0  | - | hypothetical protein |
| ECs1431 | 6.1 | 8.5  | - | unknown              |
| ECs1525 | 6.4 | -    | - | hypothetical protein |
| ECs0069 | 6.5 | 5.3  | - | hypothetical protein |
| ECs3528 | 6.5 | 7.5  | - | hypothetical protein |
| ECs5400 | 6.7 | 7.2  | - | hypothetical protein |
| ECs1266 | 6.8 | 6.3  | - | hypothetical protein |
| ECs5584 | 6.9 | 11.6 | - | hypothetical protein |
| ECs4220 | 6.9 | 7.8  | - | hypothetical protein |
| ECs5381 | 7.0 | 9.5  | - | hypothetical protein |

|         |      |      |   |                      |
|---------|------|------|---|----------------------|
| ECs5195 | 7.4  | 5.3  | - | hypothetical protein |
| ECs1091 | 8.0  | -    | - | unknown              |
| ECs3328 | 8.1  | 13.0 | - | hypothetical protein |
| ECs0497 | 8.1  | 8.8  | - | hypothetical protein |
| ECs2556 | 8.8  | 6.6  | - | hypothetical protein |
| ECs0930 | 8.9  | 8.8  | - | hypothetical protein |
| ECs4086 | 9.1  | 10.9 | - | hypothetical protein |
| ECs0121 | 9.3  | 12.6 | - | hypothetical protein |
| rrsG    | 9.8  | -    | - | unknown              |
| ECs0898 | 10.0 | 8.7  | - | hypothetical protein |
| ECs5009 | 10.3 | -    | - | hypothetical protein |
| ECs2486 | 10.3 | 6.1  | - | hypothetical protein |
| ECs1054 | 10.4 | 11.0 | - | hypothetical protein |
| ECs1655 | 10.7 | -    | - | hypothetical protein |
| ssrS    | 11.1 | 13.6 | - | unknown              |
| ECs2040 | 11.1 | 9.1  | - | hypothetical protein |
| ECs1491 | 12.6 | 7.2  | - | hypothetical protein |
| ECs0914 | 12.8 | 10.4 | - | hypothetical protein |
| ECs0646 | 13.4 | 13.3 | - | hypothetical protein |
| ECs0923 | 14.0 | 19.2 | - | hypothetical protein |
| ECs3669 | 15.0 | 7.8  | - | hypothetical protein |

|         |       |       |      |                      |
|---------|-------|-------|------|----------------------|
| ECs0429 | 15.0  | 29.9  | -    | hypothetical protein |
| ECs4597 | 15.9  | 15.7  | -    | hypothetical protein |
| csrB    | 16.6  | 8.8   | -    | unknown              |
| rnpB    | 17.5  | 10.5  | -    | unknown              |
| ECs3120 | 18.3  | 15.4  | -    | hypothetical protein |
| ECs1258 | 19.7  | 21.1  | -    | hypothetical protein |
| ECs0514 | 22.2  | 36.0  | -    | hypothetical protein |
| ECs1488 | 23.5  | 29.7  | -    | hypothetical protein |
| ssrA    | 26.1  | 14.5  | -    | unknown              |
| rrlG    | 27.8  | 19.2  | -    | unknown              |
| ECs3270 | 30.2  | 67.2  | -    | hypothetical protein |
| ECs2412 | 33.5  | 13.2  | 15.6 | hypothetical protein |
| ECs0880 | 34.7  | 38.9  | -    | hypothetical protein |
| ECs1490 | 37.7  | 33.4  | -    | hypothetical protein |
| ECs4140 | 45.7  | 26.7  | -    | hypothetical protein |
| ECs5189 | 47.2  | 48.4  | -    | hypothetical protein |
| ECs3073 | 49.3  | 39.5  | -    | hypothetical protein |
| ECs4111 | 62.5  | 67.7  | 22.2 | hypothetical protein |
| ECs0005 | 181.5 | 6.9   | -    | hypothetical protein |
| ECs0728 | 285.1 | 172.8 | -    | hypothetical protein |
| ECs2449 | 781.4 | 20.5  | -    | hypothetical protein |

|         |   |      |   |                      |
|---------|---|------|---|----------------------|
| ECs2049 | - | 5.0  | - | hypothetical protein |
| ECs3964 | - | 5.1  | - | hypothetical protein |
| ECs5415 | - | 5.3  | - | hypothetical protein |
| ECs4252 | - | 5.3  | - | hypothetical protein |
| ECs4023 | - | 5.4  | - | hypothetical protein |
| ECs2181 | - | 5.5  | - | hypothetical protein |
| ECs4008 | - | 5.7  | - | hypothetical protein |
| ECs3179 | - | 5.9  | - | hypothetical protein |
| ECs3811 | - | 5.9  | - | hypothetical protein |
| ECs2042 | - | 6.0  | - | hypothetical protein |
| ECs5399 | - | 6.2  | - | hypothetical protein |
| ECs4308 | - | 6.3  | - | hypothetical protein |
| ECs0465 | - | 6.4  | - | hypothetical protein |
| rpmE2_1 | - | 6.4  | - | unknown              |
| ECs2020 | - | 6.5  | - | hypothetical protein |
| ECs2767 | - | 6.7  | - | hypothetical protein |
| ECs2502 | - | 6.8  | - | hypothetical protein |
| ECs3022 | - | 6.9  | - | hypothetical protein |
| ECs2711 | - | 7.1  | - | hypothetical protein |
| ECs0713 | - | 8.6  | - | hypothetical protein |
| rpmJ_1  | - | 10.1 | - | unknown              |

|         |   |      |     |                      |
|---------|---|------|-----|----------------------|
| ECs4115 | - | 10.7 | -   | hypothetical protein |
| ECs2265 | - | 12.2 | -   | hypothetical protein |
| ECs4336 | - | -    | 5.9 | hypothetical protein |

---

<sup>a</sup>The values of gene expression fold change are averages of three independent biological replicates.

**Table S2.** Down-regulated genes in *Escherichia coli* O157:H7 adapted to sublethal level of thymol (1/2T) or carvacrol (1/2C), compared to non-adapted cells ( $P_{adj} \leq 0.05$ , fold change  $\geq 5.0$ ). “-” indicates no detection of differentially expressed gene at the set criteria.

| Gene ID                    | fold change <sup>a</sup> |       | Gene Product Description                                                              |
|----------------------------|--------------------------|-------|---------------------------------------------------------------------------------------|
|                            | 1/2T                     | 1/2C  |                                                                                       |
| <b>Acid Resistance</b>     |                          |       |                                                                                       |
| ECs5097                    | -12.6                    | -15.5 | arginine:agmatin antiporter                                                           |
| ECs5098                    | -11.7                    | -10.9 | AraC family transcriptional regulator, AdiY                                           |
| ECs5099                    | -21.1                    | -21.3 | biodegradative arginine decarboxylase, AdiA                                           |
| ECs4388                    | -14.6                    | -16.9 | Mg <sup>2+</sup> transport ATPase, involved in cell density-dependent acid resistance |
| hdeB                       | -11.7                    | -8.9  | acid-resistance protein                                                               |
| <b>Motility (flagella)</b> |                          |       |                                                                                       |
| ECs4405                    | -22.8                    | -14.1 | EAL domain-containing protein                                                         |
| ECs2601                    | -                        | -28.5 | transcriptional activator, FlhC                                                       |
| ECs2602                    | -5.6                     | -16.7 | transcriptional activator, FlhD                                                       |
| ECs1449                    | -5.5                     | -     | anti-sigma-28 factor, FlgM                                                            |
| ECs1448                    | -20.6                    | -     | flagella synthesis protein, FlgN                                                      |
| flgK                       | -5.0                     | -5.5  | flagellar hook-associated protein, FlgK                                               |
| fliA                       | -16.8                    | -12.2 | flagellar biosynthesis sigma factor, FliA                                             |
| fliD                       | -35.3                    | -18.5 | flagellar capping protein, FliD                                                       |
| fliS                       | -23.3                    | -13.6 | flagellar protein, FliS                                                               |
| ECs2665                    | -25.1                    | -8.2  | flagellar biosynthesis protein, FliT                                                  |



|                              |       |       |                                         |
|------------------------------|-------|-------|-----------------------------------------|
| ECs2660                      | -5.6  | -     | flagella biosynthesis protein, FliZ     |
| ECs2662                      | -29.2 | -33.6 | flagellin                               |
| motB                         | -26.7 | -24.6 | flagellar motor protein, MotB           |
| ECs2600                      | -25.9 | -16.7 | flagellar motor protein, MotA           |
| <b>Motility (chemotaxis)</b> |       |       |                                         |
| ECs2596                      | -18.1 | -15.6 | methyl-accepting chemotaxis protein II  |
| ECs2598                      | -32.9 | -23.3 | chemotaxis protein, CheA                |
| ECs2597                      | -16.4 | -19.5 | purine-binding chemotaxis protein, CheW |
| ECs2591                      | -13.5 | -13.9 | chemotaxis protein, CheZ                |
| ECs2594                      | -10.9 | -9.7  | chemotaxis methyltransferase, CheR      |
| ECs2592                      | -20.7 | -18.1 | chemotaxis regulatory protein, CheY     |
| ECs2595                      | -22.2 | -15.0 | methyl-accepting protein IV             |
| ECs2593                      | -19.3 | -20.2 | chemotaxis-specific methylesterase      |
| <b>Virulence</b>             |       |       |                                         |
| ECs2974                      | -     | -8.7  | Shiga toxin I subunit A                 |
| ECs2973                      | -     | -8.7  | Shiga toxin I subunit B                 |
| ECs1205                      | -5.8  | -5.0  | Shiga toxin 2 subunit A                 |
| hlyE                         | -5.8  | -     | hemolysin E                             |
| ECs1663                      | -     | -9.1  | outer membrane protease                 |
| ECs4573                      | -     | -23.2 | T3SS protein, EscJ                      |
| ECs4574                      | -     | -11.0 | T3SS protein, SepD                      |
| ECs4575                      | -5.4  | -     | T3SS protein, EscC                      |

|         |      |       |                    |
|---------|------|-------|--------------------|
| ECs4576 | -    | -13.3 | T3SS protein, CesD |
| ECs4583 | -    | -22.2 | T3SS protein       |
| ECs1213 | -5.1 | -     | endolysin          |
| ECs1690 | -6.4 | -     | transposase        |

### **Antibiotic Resistance**

|         |   |      |                                      |
|---------|---|------|--------------------------------------|
| ECs3247 | - | -9.1 | multidrug resistance protein K, EmrK |
|---------|---|------|--------------------------------------|

### **Amino Acid Metabolism**

|         |       |       |                                                                        |
|---------|-------|-------|------------------------------------------------------------------------|
| metF    | -14.3 | -20.2 | 5,10-methylenetetrahydrofolate reductase                               |
| ECs4759 | -9.9  | -11.4 | 5-methyltetrahydropteroyltriglutamate/homocysteine S-methyltransferase |
| glyA    | -     | -8.0  | serine hydroxymethyltransferase                                        |
| ilvM    | -7.3  | -     | acetolactate synthase 2 regulatory subunit                             |
| ECs3784 | -6.2  | -     | D-3-phosphoglycerate dehydrogenase                                     |
| ECs0991 | -5.6  | -8.1  | 3-phosphoshikimate 1-carboxyvinyltransferase                           |
| dapD    | -5.1  | -     | 2,3,4,5-tetrahydropyridine-2,6-dicarboxylate N-succinyltransferase     |
| ECs1029 | -     | -6.9  | dihydroorotate dehydrogenase 2                                         |
| pyrE    | -     | -5.7  | orotate phosphoribosyltransferase                                      |
| cysJ    | -     | -6.1  | sulfite reductase $\alpha$ subunit                                     |
| ECs3604 | -     | -5.2  | adenylyl-sulfate kinase                                                |
| ECs0146 | -5.0  | -5.7  | 2-amino-4-hydroxy-6-hydroxymethyldihydropteridine pyrophosphokinase    |
| ECs3818 | -     | -11.4 | S-adenosylmethionine synthetase                                        |

### **Nucleotide Metabolism**

|         |   |       |                                                 |
|---------|---|-------|-------------------------------------------------|
| ECs0585 | - | -11.1 | 5-(carboxyamino)imidazole ribonucleotide mutase |
|---------|---|-------|-------------------------------------------------|

|         |   |       |                                                          |
|---------|---|-------|----------------------------------------------------------|
| ECs0584 | - | -6.9  | 5-(carboxyamino)imidazole ribonucleotide synthase        |
| ECs3338 | - | -5.3  | phosphoribosylaminoimidazole-succinocarboxamide synthase |
| ECs3606 | - | -6.1  | sulfate adenylyltransferase subunit 2                    |
| ECs4530 | - | -20.0 | xanthine transporter                                     |

### **Carbohydrate Metabolism**

|      |   |       |                       |
|------|---|-------|-----------------------|
| eutD | - | -10.3 | phosphotransacetylase |
|------|---|-------|-----------------------|

### **Regulatory Functions**

|         |       |       |                                                |
|---------|-------|-------|------------------------------------------------|
| ECs3709 | -9.3  | -     | transcriptional regulator, YgeH                |
| ECs1142 | -7.5  | -10.4 | regulator, YmcC                                |
| ECs5271 | -7.1  | -16.7 | tyrosine recombinase, fimA regulator           |
| ECs4578 | -5.9  | -5.9  | negative regulator GrlR                        |
| ECs2334 | -19.9 | -     | oriC-binding nucleoid-associated protein, YdgT |
| ECs4936 | -     | -7.0  | acetate operon repressor                       |
| ECs0324 | -     | -5.7  | regulator, YkgK                                |
| ECs1417 | -5.7  | -     | DNA-binding transcriptional regulator, CsgD    |
| ECs1416 | -     | -24.8 | curli assembly protein, CsgE                   |
| ECs0275 | -     | -10.0 | Regulatory protein, Cro                        |

### **Cell Processes**

|         |      |      |                                                    |
|---------|------|------|----------------------------------------------------|
| minE    | -5.5 | -7.4 | cell division topological specificity factor, MinE |
| ECs1146 | -    | -9.5 | cold shock gene, Sfa                               |
| ECs2533 | -    | -5.7 | cold shock-like protein CspC                       |
| ECs5313 | -6.2 | -5.8 | carbon starvation protein, YjiY                    |

|                            |       |       |                                                                      |
|----------------------------|-------|-------|----------------------------------------------------------------------|
| acpS                       | -5.5  | -     | 4'-phosphopantetheinyl transferase                                   |
| ECs4500                    | -5.0  | -5.2  | lipid A-core:surface polymer ligase, WaaL                            |
| spr                        | -     | -7.2  | outer membrane lipoprotein                                           |
| ECs3104                    | -     | -7.6  | outer membrane porin protein C                                       |
| <b>Others/Unclassified</b> |       |       |                                                                      |
| oppB                       | -8.7  | -     | oligopeptide transporter permease, OppB                              |
| potB                       | -     | -5.7  | spermidine/putrescine ABC transporter                                |
| ECs4324                    | -17.8 | -     | lipoprotein                                                          |
| ECs3140                    | -17.1 | -12.5 | aluminum-inducible protein, aiS                                      |
| ECs0801                    | -14.2 | -     | excisionase                                                          |
| ECs2631                    | -13.6 | -     | derepression protein epsilon                                         |
| ECs1591                    | -8.4  | -     | prohead protease                                                     |
| ECs1590                    | -8.3  | -     | major head protein                                                   |
| ECs0602                    | -6.9  | -19.8 | H repeat-containing protein                                          |
| ECs0342                    | -6.3  | -     | pyridine nucleotide-disulfide oxidoreductase                         |
| ECs5058                    | -6.2  | -     | formate-dependent nitrite reductase complex subunit, NrfG            |
| ECs1212                    | -5.7  | -     | holin                                                                |
| ECs2463                    | -5.6  | -     | thiosulfate sulfur transferase                                       |
| ECs0146                    | -5.0  | -5.7  | 2-amino-4-hydroxy-6-hydroxymethyl dihydropteridine pyrophosphokinase |
| ECs1750                    | -7.1  | -     | voltage-gated potassium channel, kch                                 |
| ECs1558                    | -     | -10.4 | tail assembly protein                                                |
| etp                        | -     | -5.3  | phosphotyrosine-protein phosphatase                                  |

|         |   |       |                                                                          |
|---------|---|-------|--------------------------------------------------------------------------|
| ECs1560 | - | -5.2  | secreted effector protein                                                |
| ECs2491 | - | -5.2  | scaffolding protein in the formation of a murein-synthesizing holoenzyme |
| ECs1084 | - | -23.8 | anti-termination protein                                                 |
| ECs4430 | - | -17.2 | fimbrial chaperone protein                                               |
| ECs1639 | - | -16.9 | minor tail protein                                                       |

**Unknown/Hypothetical**

|         |       |       |                      |
|---------|-------|-------|----------------------|
| ECs3279 | -53.7 | -38.9 | hypothetical protein |
| ECs1691 | -50.2 | -25.5 | hypothetical protein |
| ECs1581 | -29.3 | -11.5 | hypothetical protein |
| ECs5092 | -22.9 | -14.0 | hypothetical protein |
| ECs1364 | -22.2 | -31.9 | hypothetical protein |
| ECs2714 | -20.2 | -22.0 | hypothetical protein |
| ECs4363 | -19.2 | -12.5 | hypothetical protein |
| ECs4642 | -19.1 | -     | hypothetical protein |
| ECs1580 | -18.6 | -     | hypothetical protein |
| ECs1626 | -17.7 | -     | hypothetical protein |
| ECs2187 | -17.7 | -7.0  | hypothetical protein |
| ECs1578 | -16.4 | -     | hypothetical protein |
| ECs4566 | -13.9 | -10.2 | hypothetical protein |
| ECs1627 | -13.4 | -10.4 | hypothetical protein |
| ECs1222 | -12.9 | -7.4  | hypothetical protein |
| ECs3705 | -12.8 | -     | hypothetical protein |

|         |       |       |                      |
|---------|-------|-------|----------------------|
| ECs4586 | -11.5 | -9.0  | hypothetical protein |
| ECs0317 | -11.3 | -8.2  | hypothetical protein |
| ECs1569 | -11.2 | -16.1 | hypothetical protein |
| ECs1179 | -10.6 | -15.2 | hypothetical protein |
| ECs0876 | -9.9  | -     | hypothetical protein |
| ECs5091 | -8.1  | -5.2  | hypothetical protein |
| ECs5380 | -7.5  | -12.6 | hypothetical protein |
| ECs4577 | -7.5  | -6.5  | hypothetical protein |
| ECs1173 | -7.1  | -     | hypothetical protein |
| ECs0534 | -6.9  | -     | hypothetical protein |
| ECs2531 | -6.8  | -     | hypothetical protein |
| ECs4563 | -6.8  | -     | hypothetical protein |
| ECs1788 | -6.7  | -     | hypothetical protein |
| ECs1210 | -6.7  | -     | hypothetical protein |
| ECs1141 | -6.7  | -13.8 | hypothetical protein |
| ECs5297 | -6.4  | -     | hypothetical protein |
| ECs5109 | -6.1  | -     | hypothetical protein |
| ECs1225 | -5.9  | -     | hypothetical protein |
| ECs4378 | -5.9  | -6.2  | hypothetical protein |
| ECs2918 | -5.9  | -     | hypothetical protein |
| ECs2970 | -5.9  | -5.5  | hypothetical protein |
| ECs5304 | -5.8  | -     | hypothetical protein |

|         |      |       |                      |
|---------|------|-------|----------------------|
| ECs2414 | -5.8 | -     | hypothetical protein |
| ECs0604 | -5.6 | -5.1  | hypothetical protein |
| ECs5335 | -5.6 | -     | hypothetical protein |
| ECs0061 | -5.5 | -     | hypothetical protein |
| ECs1223 | -5.5 | -     | hypothetical protein |
| ECs3706 | -5.4 | -6.2  | hypothetical protein |
| ECs1224 | -5.4 | -     | hypothetical protein |
| ECs1763 | -5.3 | -     | hypothetical protein |
| ECs5257 | -5.3 | -10.2 | hypothetical protein |
| ECs3139 | -5.1 | -     | hypothetical protein |
| ECs4562 | -5.1 | -     | hypothetical protein |
| ECs1656 | -5.0 | -     | hypothetical protein |
| ECs4362 | -5.0 | -     | hypothetical protein |
| ECs4587 | -    | -25.6 | hypothetical protein |
| ECs1733 | -    | -24.5 | hypothetical protein |
| ECs4579 | -    | -18.7 | hypothetical protein |
| ECs5256 | -    | -18.6 | hypothetical protein |
| ECs4584 | -    | -16.1 | hypothetical protein |
| ECs1140 | -    | -14.5 | hypothetical protein |
| ECs4542 | -    | -10.6 | hypothetical protein |
| ECs1567 | -    | -10.2 | hypothetical protein |
| ECs5305 | -    | -9.3  | hypothetical protein |

|         |   |      |                      |
|---------|---|------|----------------------|
| ECs2627 | - | -9.2 | hypothetical protein |
| ECs1139 | - | -9.1 | hypothetical protein |
| ECs4588 | - | -7.1 | hypothetical protein |
| ECs5259 | - | -6.4 | hypothetical protein |
| ECs3608 | - | -5.9 | hypothetical protein |
| ECs1576 | - | -5.9 | hypothetical protein |
| ECs4585 | - | -5.8 | hypothetical protein |
| ECs2534 | - | -5.8 | hypothetical protein |
| ECs2430 | - | -5.7 | hypothetical protein |
| ECs5260 | - | -5.2 | hypothetical protein |
| ECs2626 | - | -5.2 | hypothetical protein |
| ECs0472 | - | -5.1 | hypothetical protein |
| ECs4653 | - | -5.0 | hypothetical protein |

---

<sup>a</sup>The values of gene expression fold change are averages of three independent biological replicates.
